# Supplementary material for: Differential molecular response of monodehydroascorbate reductase and glutathione reductase by nitration and S-nitrosylation
Source: PubMed Central journal article supplement (PMC4566986; doi:10.1093/jxb/erv306), 2015-06-25
Supplement: supp_erv306_jexbot147389_file001.pdf [file supp_erv306_jexbot147389_file001.pdf]

**Title: Differential regulation of monodehydroascorbate reductase (MDAR) and glutathione reductase (GR) by nitration and S-nitrosylation**

Begara-Morales et al.

**Supplemental Table 1.** Characterization in terms of evolutionary conservation (rho score and residue variation in the column of the multiple alignment file), likelihood of tyrosine phosphorylation (phosphorylation score), solvent-accessible surface area (ASA) and estimated pKa of the 3 tyrosine (Y) and 2 cys (C) residues susceptible of being responsible for the modulation of the enzymatic activity of pea MDAR by peroxynitrite and GSNO

| <b>Residue</b> | <b>Rho</b> | <b>Variability</b> | <b>NetPhos score</b> | <b>ASA(Å<sup>2</sup>)</b> | <b>pKa</b> |
|----------------|------------|--------------------|----------------------|---------------------------|------------|
| Tyr213         | 3.51       | YF                 | 0.564                | 71                        | 11.13      |
| Tyr292         | 1.0        | Y                  | 0.402                | 32                        | 9.95       |
| Tyr345         | 7.14       | FY.C               | 0.040                | 104                       | 11.99      |
| Cys68          | 2.58       | CA                 |                      | 61                        | 9.09       |
| Cys197         | 5.04       | LFCI               |                      | 5                         | 13.17      |

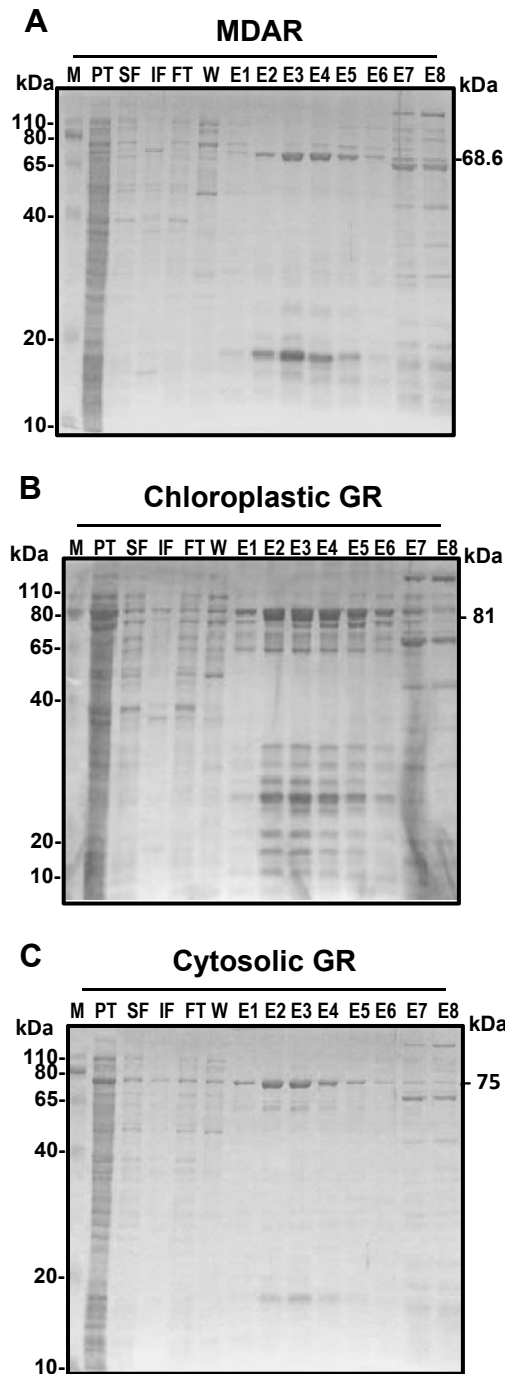

**Supplemental Figure 1. SDS-PAGE analysis of the purification of the recombinant proteins. (A)** Peroxisomal monodehydroascorbate reductase (MDAR). **(B)** Chloroplastic glutathione reductase. **(C)** Cytosolic glutathione reductase. The gel was stained with Coomassie blue. M, molecular markers; PT, total protein; SF, soluble fraction; IF, insoluble fraction; FT, flow-through; W, wash; E1-E8, elution fractions.

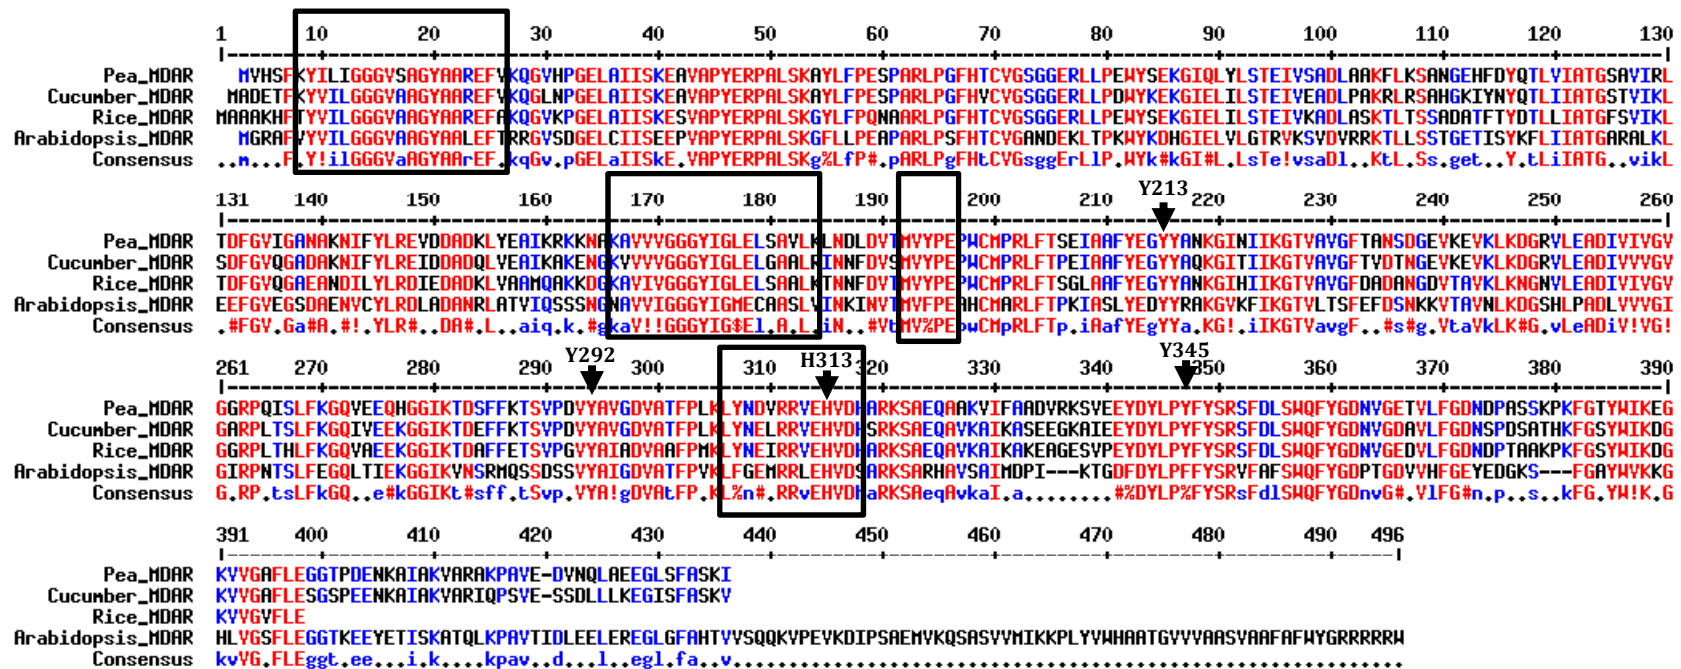

**Supplemental Figure 2. Multiple alignment of the deduced amino acid sequences of MDAR in different plant species.** Nucleotide binding zones are highlighted within a box. Arrows indicate tyrosines targets of nitration (Y213, Y292 and Y345) and Histidine 313. Alignment was carried out using Multalin (<http://multalin.toulouse.inra.fr/multalin/>). Pea\_MДАР: MDAR from *Pisum sativum* (AAV11490.1); Cucumber\_MДАР: MDAR from *Cucumis sativa* (BAA05408.1); Rice\_MДАР: MDAR from *Oryza sativa* (BAA77282.1); Arabidopsis\_MДАР: MDAR from *Arabidopsis thaliana* (AEE77367.1).
